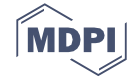

Article

# Codon usage and evolutionary rates of the 2019-nCoV genes

Maddalena Dilucca <sup>1,2†</sup> , Sergio Forcelloni <sup>1,‡</sup>, Athanasia Pavlopoulou <sup>3,4‡</sup> Alexandros G. Georgakilas <sup>5,‡</sup> and Andrea Giansanti <sup>1,6,‡</sup>

<sup>1</sup> Physics Department, Sapienza University of Rome, Rome, Italy; maddalena.dilucca@gmail.com

<sup>2</sup> Liceo Scientifico Statale Augusto Righi, Rome, Italy

<sup>3</sup> Izmir Biomedicine and Genome Center (IBG), 35340 Balcova, Izmir, Turkey

<sup>4</sup> Izmir International Biomedicine and Genome Institute, Dokuz Eylül University, 35340 Balcova, Izmir, Turkey

<sup>5</sup> DNA Damage Laboratory, Physics Department, School of Applied Mathematical and Physical Sciences, National Technical University of Athens (NTUA), Athens, Greece

<sup>6</sup> INFN Roma1 unit, Rome, Italy

\* Correspondence: maddalena.dilucca@gmail.com; MD

‡ These authors contributed equally to this work.

Version March 27, 2020 submitted to Journal Not Specified

**Abstract:** Severe acute respiratory syndrome coronavirus 2 (2019-nCoV), which first broke out in Wuhan (China) in December of 2019, causes a severe acute respiratory illness with a mortality ranging from 3% to 6%. To better understand the evolution of the newly emerging 2019-nCoV, in this paper, we analyze the codon usage pattern of 2019-nCoV. For this purpose, we compare the codon usage of 2019-nCoV with that of other 30 viruses belonging to the subfamily of orthocoronavirinae. We found that 2019-nCoV shows a rich composition of AT nucleotides that strongly influences its codon usage, which appears to be not optimized to human host. Then, we study the evolutionary pressures influencing the codon usage and evolutionary rates of the sequences of five conserved genes that encode the corresponding proteins (viral replicase, spike, envelope, membrane and nucleocapsid) characteristic of coronaviruses. We found different patterns of both mutational bias and nature selection that affect the codon usage of these genes at different extents. Moreover, we show that the two integral membrane proteins (matrix and envelope) tend to evolve slowly by accumulating nucleotide mutations on their genes. Conversely, genes encoding nucleocapsid (N), viral replicase and spike proteins are important targets for the development of vaccines and antiviral drugs, tend to evolve faster as compared to other ones. Taken together, our results suggest that the higher evolutionary rate observed for these two genes could represent a major barrier in the development of antiviral therapeutics 2019-nCoV.

**Keywords:** genome; coronavirus; 2019-nCoV; codon usage bias; evolutionary rates; Forsdyke plot.

## 1. Introduction

The name “coronavirus” is derived from the Greek *κορωννα*, that mean crown. The first complete genome of coronavirus (mouse hepatitis virus - MHV), a positive sense, single-stranded RNA virus, was first reported in 1949. It belongs to the family Coronaviridae and ranges from 26.4 (ThCoV HKU12) to 31.7 (SW1) kb in length [10], making it the largest genomes among all known RNA viruses, with G + C contents varying from 32% to 43% [20]. The coronavirinae family consists of four genera based on their genetic properties, including genus: *Alphacoronavirus*, *Betacoronavirus* (subdivided in subgroups A, B, C and D), *Gammacoronavirus* and *Deltacoronavirus*. Coronavirus can infect humans and many different animal species, including swine, cattle, horses, camels, cats, dogs, rodents, birds,

28 bats, rabbits, ferrets, mink, snake, and other wildlife animals. To date, 30 CoVs genomes have been  
29 identified. Only seven CoVs have been identified that infect humans, including Human CoV-229E  
30 (HCoV-229E), Human coronavirus NL63 (HCoV-NL63), HumanCoV-OC43 (HCoV-OC43), Human  
31 CoV- HKU1 (HCoV-HKU1), Human SARS related coronavirus (SARSr-CoV), Middle East Respiratory  
32 Syndrome (MERS-CoV) and SARS CoV 2 ( nCoV) [26].

33 Severe acute respiratory syndrome CoV 2 (2019-nCoV), which first broke out in Wuhan (China) in  
34 December of 2019, causes a severe acute respiratory illness with a mortality rate from 3% to 6%.  
35 The newly sequenced virus genome encodes two open reading frames (ORFs), ORF1a and ORF1ab,  
36 the latter encodes replicase polyproteins, and four structural proteins [19], [9]: the spike-surface  
37 glycoprotein (protein S), the small envelop protein (protein E), the matrix protein (M), and the  
38 nucleocapsid protein (N).

39 The phenomenon of codon usage bias (CUB) exists in many genomes including RNA genomes and  
40 it is actually determined by mutation and selection [1]. As it is well-known, the non-random choice  
41 of synonymous codons varies among species that are potential host for viruses [11] [? ]. It is then  
42 important to study patterns of common codon usage in coronaviruses because CUB can be related to  
43 the driving forces that shape the evolution of small RNA viruses. Mutational bias has been considered  
44 as the major determinant of codon usage variation among RNA viruses [13]. Indeed, RNA viruses  
45 show an effective number of codons (ENC) that is quite high (ENC>45) pointing to a quite random  
46 codon usage, whereas if one uses the adaptive index CAI then the viral CUB is consistent with that of  
47 the host, as observed in the Equine infectious anemia virus (EIAV) or Zaire ebolavirus (ZEBOV) [5].

48 The aim of this study was to carry out a comprehensive analysis of codon usage and composition of  
49 coronavirus and explore the possible leading evolutionary determinants of the biases found.

## 50 2. Results

### 51 2.1. Nucleotide composition

52 The nucleotide content of 30 coronaviruses coding sequences are calculated. The results reveal  
53 that the nucleotide A is the most frequent base and the nucleotide frequencies are in order A > T > G > C  
54 [19]. For nCoV we note a different trend T > A > G > C, but in totally AT% is more used than GC% (See  
55 Table 3). The GC content in 2019-nCoV is  $0.373 \pm 0.05$ .

### 56 2.2. All the sequenced 2019-nCoV genomes share a common codon usage

57 We downloaded the protein-coding sequences of 2019-nCoV from GIDAID database, by  
58 classifying each n-CoV based on the geographic location where they are sequenced (see tree in  
59 A2). For each n-CoV genome, we calculated the relative synonymous codon usage (RSCU), in the  
60 form of a 61-component vector. In Fig A1, we show the heatmap and the associated clustering of these  
61 vectors. Despite the high mutation rate that characterizes 2019-nCoV genome [30], [4], the overall  
62 codon usage bias among 2019-nCoV strains appears to be similar. Moreover, their associated vectors  
63 did not cluster according to geographic location, thus confirming the common origin of these genomes.  
64 Therefore, we will consider a unique vector to represent 2019-nCoV in the following analyses.

### 65 2.3. Codon usage of 2019-nCoV genome strains

66 We compared the codon usage of 2019-nCoV with that of the other coronavirus genomes. For  
67 this purpose, we used the RSCU which is a biologically relevant metric of distance between the codon  
68 usage in the protein-coding sequences of these genomes. In Fig. 1, we report the heatmap of the RSCU  
69 values associated with the coronavirus. The RSCU values of the majority of the codons scored between  
70 0 and 3.1 (see legend in Figure 1). Interestingly, analysis of codon bias in coronavirus genomes reveal  
71 that the newly identified coronavirus 2019-nCoV Wuhan-Hu-1 sequence has a clear origin from other  
72 beta-CoV's and is closer, specifically, to SARSr-CoV, consistent with their phylogenetic relationships  
73 (Figure A3). In line with previous observations, we show that the mean CpG relative abundance in the

74 coronavirus genomes is markedly suppressed [27]. Specifically, GGG, GGC, CCG (pyrimidine-CpG)  
75 and ACG (purine-CpG) present a very low frequency of occurrence, probably due to the relative tRNA  
76 abundance of the host. In fact, in human the abundance of tRNA in codons GGG, GGC, CCG and  
77 ACG are respectively: 0, 0, 4 and 7.

78 In 2019-nCoV, the most frequently used codons are CGU (arginine, 2.34 times) and GGU (glycine,  
79 2.42), whereas the least used codons are GGG (glycine) and UCG (serine). We also note the most  
80 frequently used codons for each amino acid, ended in either U or A. [5]

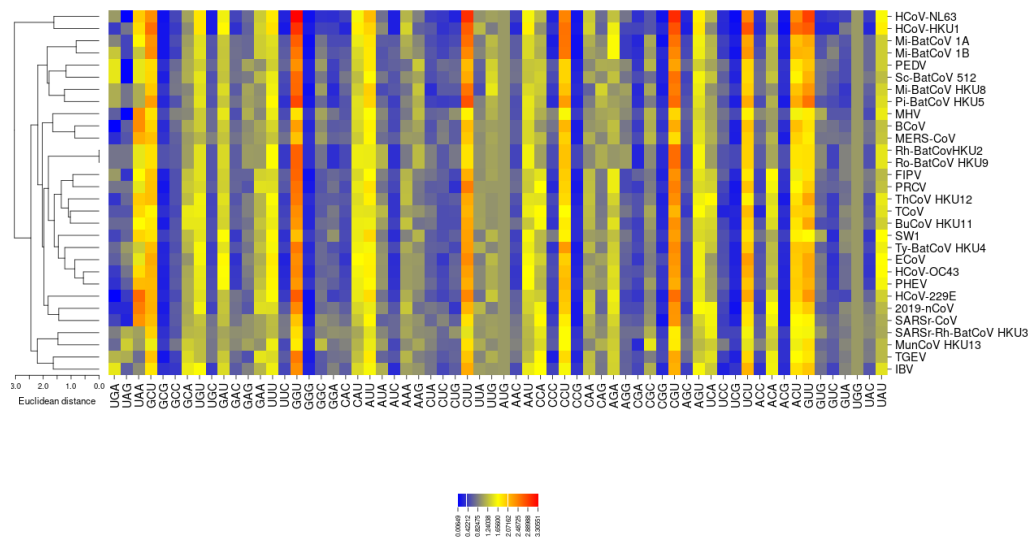

**Figure 1. Clustering of the RSCU vectors associated to coronavirus.** Analysis of codon bias in coronavirus genomes reveal that the newly identified coronavirus 2019-nCoV Wuhan-Hu-1 sequence was closer to SARSr-CoV as in the reconstructed phylogenetic tree shown in Figure A3. Heatmap are drawn with the CIMminer software [25], which uses Euclidean distances and the average linkage algorithm.

#### 81 2.4. The codon usage of 2019-nCoV is not optimized to the host.

82 To measure the codon usage bias in the coronavirus genomes, we used the effective number  
83 of codons (ENC) value and the Competition Adaptation Index (CAI). In Table 2 and 3, we report  
84 the ENC and CAI values for all the coronaviruses we considered in this work. To visually enhance  
85 the differences among the codon usage of these coronaviruses we calculated Zscore of a single virus  
86 in relation to the other members of the CoV subfamily. Interestingly, the ENC value associated to  
87 2019-nCoV ( $51.9 \pm 2.59$ ) is lower than the average of all Coronaviruses, meaning that 2019-nCoV uses  
88 a broader set of synonymous codons in its coding sequences. We also note that CAI of 2019-nCoV  
89 ( $0.727 \pm 0.054$ ) is lower than the average one, underscoring that this coronavirus tend to use codons  
90 that are not optimized to the host. We calculate similarity index (SiD) to measure the effect of codon  
91 usage bias of the host (human) on the 2019-nCoV genes. The SiD values range from 0 to 1, with higher  
92 values indicating that the host has a dominant effect on the usage codons. [16] In our case SiD for  
93 2019-nCoV is equal to 0.78.

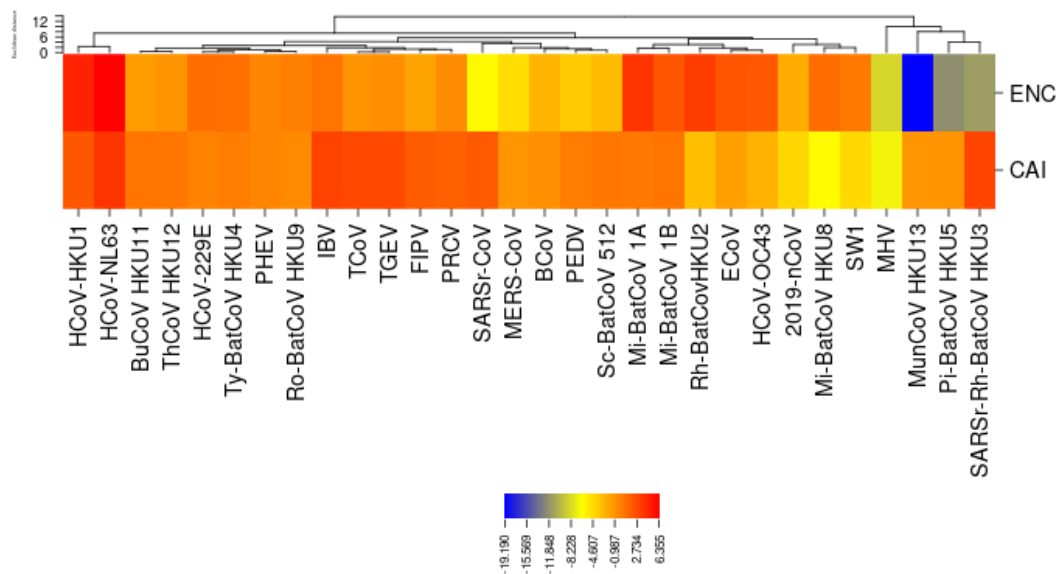

**Figure 2. Z-score values.** Z-score is calculated for two codon bias indexes ENC and CAI. We show in figure that a lot of coronavirus have a codon usage major than the average value of the family (Z-score 3). For what concerns 2019-nCoV, it presents average CAI and ENC higher than the average too.

## 94 2.5. Genes

95 The genome of the newly emerging 2019-nCoV consists of a single, positive-stranded RNA,  
 96 that is approximately 30K nucleotides long. The overall genome is organized similar to other  
 97 coronaviruses. Ceraolo et al. performed a cross-species analysis for all proteins encoded by the  
 98 2019-nCoV (see Figure 3-4 in [3]). The newly sequenced virus genome encodes polyproteins, common  
 99 to all betacoronavirus, which are further cleaved into the individual structural proteins E, M, N and S,  
 100 as well the non-structural RdRP [28]. So, only five viral genes are classified according to their viral  
 101 location and studied for each virus because the short length and insufficient codon usage diversity of  
 102 the other genes might have biased the results. The corresponding gene products including S protein  
 103 regulates virus attachment to the receptor of the target host cell [2]; the E protein functions to assemble  
 104 the virions and acts as an ion channel [18], the M protein plays a role in virus assembly and is involved  
 105 in biosynthesis of new virus particles [17] the N protein forms the ribonucleoprotein complex with  
 106 the virus RNA [19]. Finally, RdRP catalyzes viral RNA synthesis. We calculate for these five proteins  
 107 the RSCU vectors in each virus of the dataset (see Figure 3). We show that only for gene E, M and  
 108 N 2019-nCoV cluster with SARSr-CoV and SARSr-Rh-BatCoV HKU3, consistent with the inferred  
 109 phylogeny shown in Figure A3.

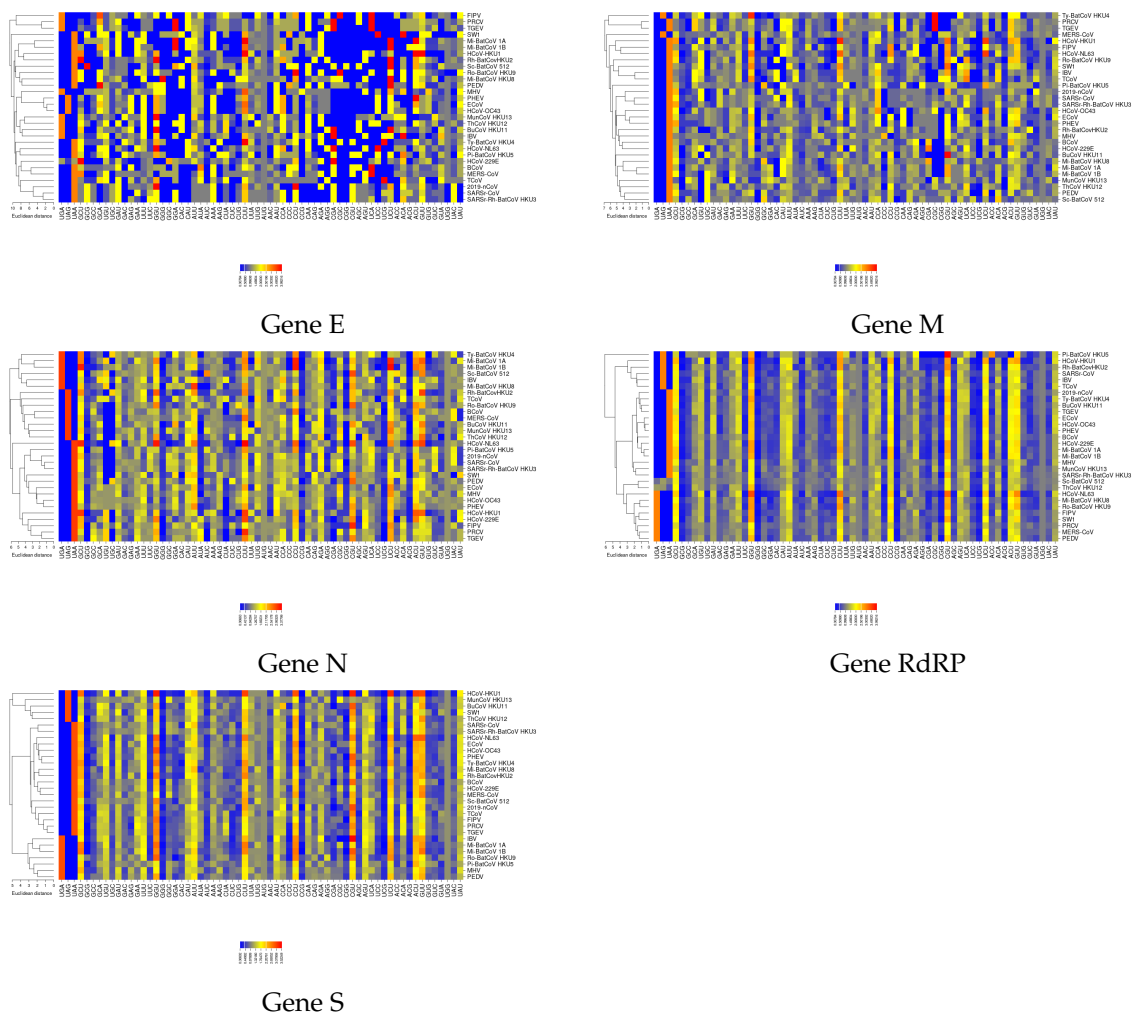

**Figure 3. RSCU vectors of five different genes.** Heatmaps confirm that the newly identified coronavirus 2019-nCoV Wuhan-Hu-1 sequence is closer to SARS and HCoV 229E, except for gene RdRP and gene S.

## 110 2.6. The ENC plot analysis of individual genes of 2019-nCoV

111 To further investigate which factors account for the low codon usage bias of the different genes  
 112 in coronavirus, we analyzed the relationship between the ENC value and the percentage of G or C  
 113 in the third position codons (GC3s). In Figure 4, we show separately the ENC-plots obtained for the  
 114 five genes (M, N, S, E, and RdRP), together with the Wright's theoretical curve, corresponding to the  
 115 case when the codon usage is only determined by the GC3s [29]. We would like to point out that if  
 116 mutational bias, as quantified by GC-content in the generally neutral 3rd codon position, is the main  
 117 factor in determining the codon usage among these genes, the corresponding point in the ENC-plot  
 118 should lie on or just below Wright's curve. In Figure 4, all distributions lie below the theoretical  
 119 curve, an indication that not only mutational bias but also natural selection plays a non-negligible role in the  
 120 codon choice in all genes. This is exemplified by the violinplots in Figure 5 of the distances between the  
 121 genes and Wright's theoretical curve. Genes N, S, and RdRP are more scattered below the theoretical  
 122 curve than those of genes M and E, implying that in the latter the codon usage patterns are pretty  
 123 consistent with the effects of mutational bias. Interestingly, data points corresponding to the gene N,  
 124 which is the major viral structural component needed to protect and encapsidate the viral RNA, is  
 125 localized around GC3=0.5 (See Figure 4). This means that the displacement under the curve most likely  
 126 reflects the selective pressure exerted on this gene. Conservely, all other genes show a displacement

127 towards lower values of GC3-content, thus corroborating our previously mentioned observation that  
128 coronaviruses tend to use codons that end with A and U (see section 2.3).

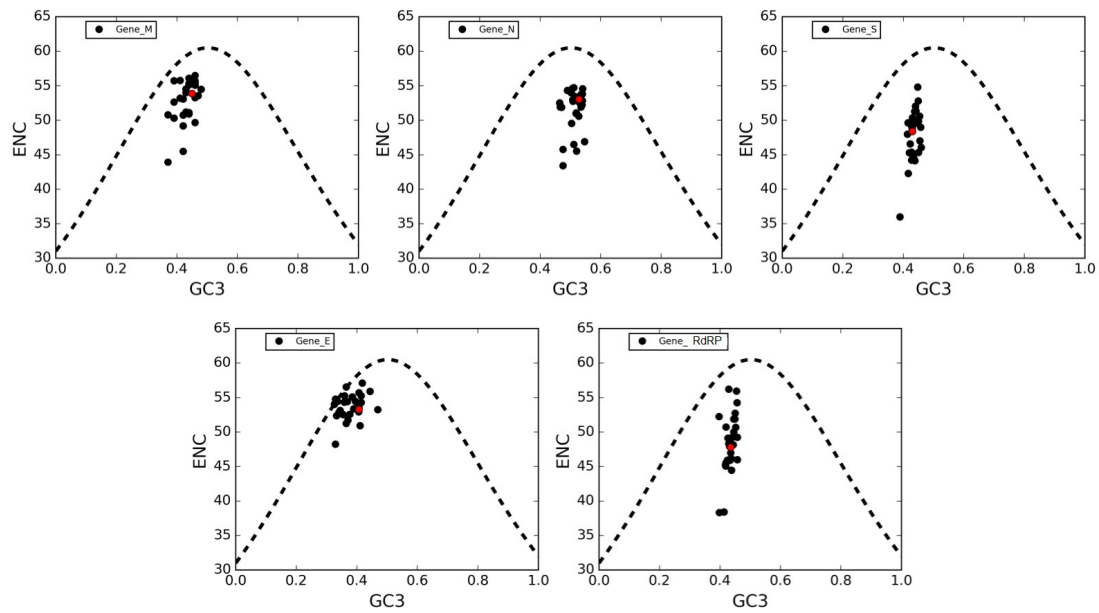

**Figure 4. ENC-plots of genes M, N, S, E, RdRP.** In these plots, each point corresponds to a single gene. The black-dotted lines in all panels are plots of Wright's theoretical curve corresponding to the case of a CUB merely due to mutational bias (no selective pressure). Red dots represent 2019-nCoV genes.

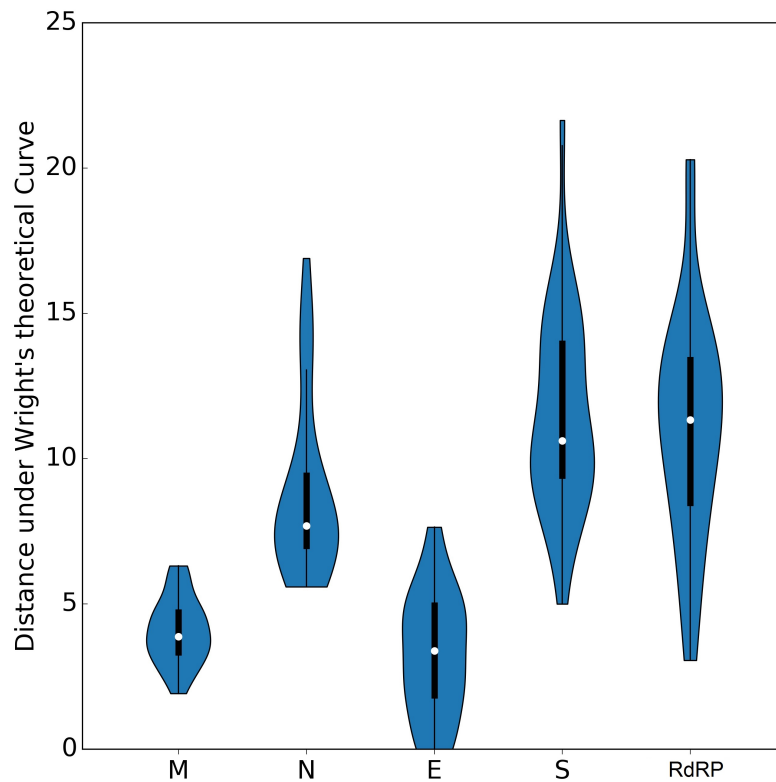

**Figure 5. Distances from Wright's curve.** Box plots are calculated for each gene for values of distance from theoretical Wright's curve. Genes N, S, and RdRP are more scattered below the theoretical curve than those of genes M and E, implying that in the latter the codon usage patterns are pretty consistent with the effects of mutational bias.

## 129 2.7. Neutrality plot

130 A neutrality plot analysis was performed to estimate the role of mutational bias and natural  
131 selection in shaping the codon usage patterns of the five genes under investigation. In this plot, the  
132 average GC-content in the first and second positions of codons (GC12) is plotted against GC3s, which  
133 is considered as a pure mutational parameter. In Figure 5, we report the neutrality plots obtained for  
134 genes M, N, S, E, RdRP, together with the best-fit lines and the slopes associated with them.

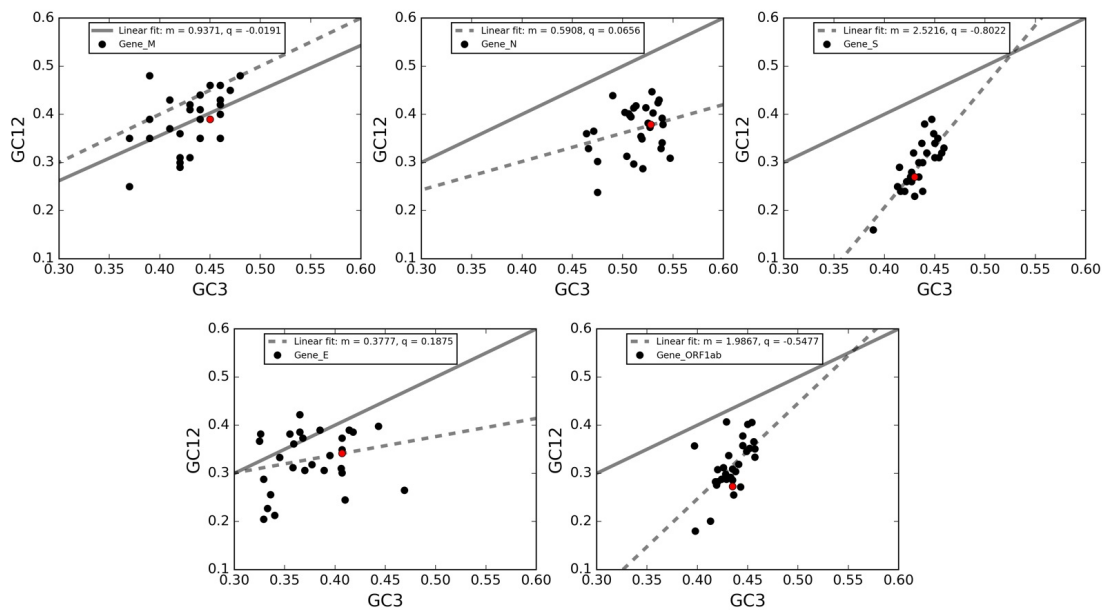

**Figure 6. Neutrality plot of genes M, N, S, E, RdRP.** In these plots, each point corresponds to a single gene in a virus. The solid black lines in all panels are the bisectors corresponding to the case of a CUB merely due to mutational bias (no selective pressure). The black-dotted lines are the linear regressions. Red dots represent 2019-nCoV genes.

135 The rationale to understand the results is that the wider is the deviation between the slope of the  
136 regression line and the bisector, the stronger is the action of selective pressure. All correlations are  
137 highly significant (Spearman correlation -  $R^2$  analysis,  $p$ -value<0.0001). By comparing the divergences  
138 between the regression lines and the bisectors in each panel, we reveal that the five genes here  
139 considered are subject to different balance between natural selection and mutational bias. Specifically,  
140 in line with the ENC-plot analyses, the genes S and RdRP present the largest deviations of their  
141 regression lines from the bisector lines and, therefore, a stronger action of natural selection. Conversely,  
142 the regression line for the gene M is closer to the bisector than the other genes, meaning that the  
143 this gene is the least one subject to the action of natural selection. Finally, the genes E and N are  
144 intermediate between the previous cases.  
145 It is worth noting that almost all data points are located below the bisector lines, implying a selective  
146 tendency for a higher AT content in the first two codon positions than in the third one. In addition,  
147 both GC3 and GC12 are lower than 0.5, thus showing a general preference for A and T bases in all  
148 three codon positions. Interestingly, data points associated to gene M and E are closer to the bisector  
149 lines as compared to gene N, S, and RdRP. This observation means that the GC content in the first  
150 two codon positions tend to be in proportion to GC3 in gene M and E, and this partially explains the  
151 closeness of these two genes to the Wright theoretical curve in Figure 4.

## 152 2.8. Forsdyke plot

153 We analyze the rate of evolution that characterize these genes by confronting the nucleotide  
154 sequences of the newly emerging 2019-nCoV and their corresponding protein sequences with those  
155 of other coronaviruses here considered. Each gene of 2019-nCoV was compared to the orthologous  
156 gene in one of the 30 coronaviruses to estimate evolutionary divergences. Each pair of homologous  
157 genes is represented by a point in the Forsdyke plot [8], which correlates protein divergence with DNA  
158 divergence. Each point in Forsdyke plots measures the divergence between pairs of orthologous genes  
159 in the two species, as projected along with the phenotypic (protein) and nucleotidic (DNA) axis. Thus,  
160 the slope is an estimation of the fraction of DNA mutations that result in amino acid substitutions



161 in the speciation process between two species [8]. In Figure 7, we show separately for each gene the  
162 associated Forsdyke plot.

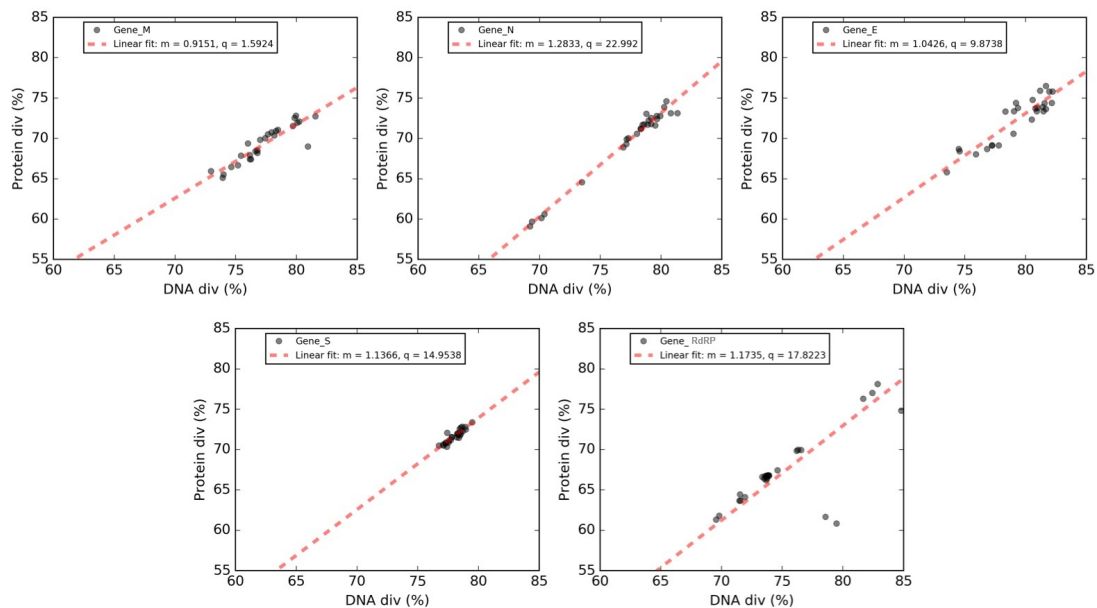

**Figure 7. Forsdyke plots of genes M, N, S, E, RdRP.** Phenotype (Protein div) vs. nucleotide (DNA div) sequence divergence between 2019-nCoV and homologous genes in the other coronaviruses. Each point corresponds to an individual gene. In each panel, we report the best-fit line in red, together with the associated values of the slope (m) and the intercept (q) in the legend.

163 Overall, protein and DNA sequence divergences are linearly correlated, and these correlations  
164 can be expressed through slopes and intercepts of the regression lines.

165 Genes M and E show quite low slopes, indicating that these proteins tend to evolve slowly by  
166 accumulating nucleotide mutations on their genes. Conversely, the steeper slopes for genes N, RdRP,  
167 and S indicate that these genes tend to evolve faster compared to other ones. A plausible explanation  
168 for this observation is that protein N due to its immunogenicity, has been frequently used to generate  
169 specific antibodies against various animal coronavirus, including in SARS [24]. The viral replicase  
170 polyprotein that is essential for the replication of viral RNA and, finally, the gene S encodes the protein  
171 that is responsible for the “spikes” present on the surface of coronaviruses. Taken together, our results  
172 suggest that the higher evolutionary rate observed for these proteins could represent a major obstacle  
173 to in the development of a antiviral therapeutics against 2019-nCoV.

174 2.9. Tables

**Table 1. Coronaviruses (CoVs) in dataset.** We report name, abbreviation, NCBI code and bp size for each virus.

| Family           | Name                                                           | Abbreviation         | NCBI code   |
|------------------|----------------------------------------------------------------|----------------------|-------------|
| alphacoronavirus | Feline infectious peritonitis virus                            | FIPV                 | NC_002306.3 |
| alphacoronavirus | Human coronavirus 229E                                         | HCoV-229E            | NC_002645.1 |
| alphacoronavirus | Human coronavirus NL63                                         | HCoV-NL63            | NC_005831.2 |
| alphacoronavirus | Miniopterus bat coronavirus 1A                                 | Mi-BatCoV 1A         | NC_010437.1 |
| alphacoronavirus | Miniopterus bat coronavirus 1B                                 | Mi-BatCoV 1B         | EU420137.1  |
| alphacoronavirus | Miniopterus bat coronavirus HKU8                               | Mi-BatCoV HKU8       | NC_010438.1 |
| alphacoronavirus | Porcine epidemic diarrhea virus                                | PEDV                 | NC_003436.1 |
| alphacoronavirus | Porcine respiratory coronavirus                                | PRCV                 | DQ811787.1  |
| alphacoronavirus | Rhinolophus bat coronavirus HKU2                               | Rh-BatCovHKU2        | NC_009988.1 |
| alphacoronavirus | Scotophilus bat coronavirus 512                                | Sc-BatCoV 512        | NC_009657.1 |
| alphacoronavirus | Transmissible gastroenteritis virus                            | TGEV                 | NC_038861.1 |
| betacoronavirus  | Bovine coronavirus                                             | BCoV                 | NC_003045.1 |
| betacoronavirus  | Equine coronavirus                                             | ECoV                 | LC061274.1  |
| betacoronavirus  | Human coronavirus HKU1                                         | HCoV-HKU1            | NC_006577.2 |
| betacoronavirus  | Human coronavirus OC43                                         | HCoV-OC43            | NC_006213.1 |
| betacoronavirus  | Mouse hepatitis virus                                          | MHV                  | NC_001846.1 |
| betacoronavirus  | Porcine hemagglutinating encephalomyelitis virus               | PHEV                 | DQ011855.1  |
| betacoronavirus  | <b>Severe acute respiratory syndrome-related coronavirus 2</b> | <b>2019-nCoV</b>     | NC_045512.2 |
| betacoronavirus  | Severe acute respiratory syndrome-related coronavirus          | SARSr-CoV            | NC_004718.3 |
| betacoronavirus  | SARS-related Rhinolophus bat coronavirus HKU3/                 | SARSr-Rh-BatCoV HKU3 | NC_009694.1 |
| betacoronavirus  | Middle East respiratory syndrome-related coronavirus           | MERS-CoV             | NC_019843.3 |
| betacoronavirus  | Bat coronavirus HKU9-1                                         | Ro-BatCoV HKU9       | NC_009021.1 |
| betacoronavirus  | Pipistrellus bat coronavirus HKU5                              | Pi-BatCoV HKU5       | NC_009020.1 |
| betacoronavirus  | Tyonycteris bat coronavirus HKU4                               | Ty-BatCoV HKU4       | NC_009019.1 |
| gammacoronavirus | Avian infectious bronchitis virus                              | IBV                  | NC_001451.1 |
| gammacoronavirus | Beluga whale coronavirus SW1                                   | SW1                  | NC_010646.1 |
| gammacoronavirus | Turkey coronavirus                                             | TCoV                 | NC_010800.1 |
| deltacoronavirus | Bulbul coronavirus HKU11-934                                   | BuCoV HKU11          | NC_011547.1 |
| deltacoronavirus | Munia coronavirus HKU13-3514                                   | MunCoV HKU13         | NC_011550.1 |
| deltacoronavirus | Thrush coronavirus HKU12-600                                   | ThCoV HKU12          | NC_011549.1 |

**Table 2. Codon usage bias of different coronavirus.**

| Abbr.                | ENC            | CAI           |
|----------------------|----------------|---------------|
| BCoV                 | 52.089 ± 2.357 | 0.690 ± 0.040 |
| BuCoV HKU11          | 51.414 ± 1.855 | 0.679 ± 0.045 |
| ECoV                 | 49.311 ± 4.024 | 0.691 ± 0.025 |
| FIPV                 | 51.568 ± 1.999 | 0.667 ± 0.048 |
| HCoV-HKU1            | 44.582 ± 7.331 | 0.675 ± 0.021 |
| HCoV-229E            | 50.290 ± 3.629 | 0.684 ± 0.023 |
| HCoV-NL63            | 44.675 ± 5.350 | 0.664 ± 0.028 |
| HCoV-OC43            | 49.573 ± 3.660 | 0.692 ± 0.020 |
| IBV                  | 50.654 ± 2.900 | 0.653 ± 0.053 |
| MERS-CoV             | 53.087 ± 2.526 | 0.689 ± 0.029 |
| MHV                  | 53.628 ± 1.725 | 0.712 ± 0.023 |
| Mi-BatCoV 1A         | 48.233 ± 3.810 | 0.682 ± 0.028 |
| Mi-BatCoV 1B         | 49.311 ± 4.116 | 0.681 ± 0.026 |
| Mi-BatCoV HKU8       | 50.120 ± 4.139 | 0.702 ± 0.016 |
| MunCoV HKU13         | 53.963 ± 0.863 | 0.691 ± 0.041 |
| <b>2019-nCoV</b>     | 51.984 ± 2.596 | 0.727 ± 0.054 |
| PEDV                 | 52.442 ± 2.153 | 0.683 ± 0.037 |
| PHEV                 | 51.093 ± 3.553 | 0.684 ± 0.024 |
| Pi-BatCoV HKU5       | 53.913 ± 1.359 | 0.691 ± 0.042 |
| PRCV                 | 51.276 ± 3.154 | 0.675 ± 0.029 |
| Rh-BatCovHKU2        | 48.084 ± 4.491 | 0.693 ± 0.016 |
| Ro-BatCoV HKU9       | 50.910 ± 2.311 | 0.686 ± 0.033 |
| SARSr-CoV            | 53.642 ± 2.436 | 0.670 ± 0.038 |
| SARSr-Rh-BatCoV HKU3 | 54.305 ± 1.613 | 0.667 ± 0.030 |
| Sc-BatCoV 512        | 52.379 ± 2.631 | 0.680 ± 0.043 |
| SW1                  | 50.865 ± 1.791 | 0.706 ± 0.027 |
| TCoV                 | 51.343 ± 2.317 | 0.659 ± 0.046 |
| TGEV                 | 51.393 ± 3.269 | 0.665 ± 0.037 |
| ThCoV HKU12          | 51.432 ± 2.833 | 0.681 ± 0.031 |
| Ty-BatCoV HKU4       | 50.374 ± 3.742 | 0.683 ± 0.032 |

**Table 3. Statistics in nCoV.**

|              | A     | C     | G     | T     |
|--------------|-------|-------|-------|-------|
| <b>ObsN</b>  | 8708  | 5338  | 5720  | 9369  |
| <b>Freq.</b> | 0.298 | 0.183 | 0.196 | 0.321 |

### 175 3. Discussion

176 To investigate the factors leading to the 2019-nCoV and other viruses related to codon usage  
177 patterns, several analytical methods were used in our study. First, the RSCU value of the 2019-nCoV  
178 was calculated. Despite the high mutation rate that characterize 2019-nCoV, we do not show differences  
179 in codon usage between these genomes. Moreover, their associated vectors did not cluster for  
180 geographically position, thus confirming the common origin of these genomes. The nucleotide  
181 composition confirm higher AT% content and low GC% content as it is common in RNA viruses  
182 such as Severe Acute Respiratory Syndrome (SARS) [? ]. The results indicate also that codon usage  
183 bias exists and that the 2019-nCoV preferred codons almost all end in U. The codon usage bias was  
184 further confirmed by the mean ENC value of 51.9 (a value greater than 45 is considered as a slight  
185 codon usage bias due to mutation pressure or nucleotide compositional constraints). The same analysis  
186 is effectuated with CAI index, that it is calculated on the with RNA of codons expressed most often.  
187 This suggests that the RNA viruses with high ENC values (and low CAI) adapt to the host with  
188 various preferred codons. So a low biased codon usage pattern might allow the virus make use of  
189 several codons for each amino acid, and might be beneficial for viral replication and translation in the

190 host cells. The ENC-plot analysis reveals that natural selection plays an important role in the codon  
191 choice of the five conserved viral genes here considered: RdRP, S, E, M, and N. However, genes N, S,  
192 and ORF1ab are more scattered below the theoretical curve than those of genes M and E, implying  
193 that in the latter the codon usage is under more strict control by mutational bias. According with  
194 this analysis, the genes S and RdRP present the largest deviations of their linear regressions from  
195 the bisectors lines in the neutrality plot analysis that implies a stronger action of natural selection.  
196 Conversely, the regression line for the gene M is closer to the bisector than the other genes, meaning  
197 that this gene is the least one subject to the action of natural selection. Finally, the genes E and N are  
198 intermediate between the previous cases.

199 To analyze the rate of evolution that characterize these genes by confronting the nucleotide sequences  
200 we use the Forsdyke plot that correlates protein divergence with DNA divergence. The two proteins  
201 M and E show quite low slopes, indicating that these proteins tend to evolve slowly by accumulating  
202 nucleotide mutations on their genes. Conversely, the steeper slopes for gene N and RdRP and the  
203 gene S encoding for the S protein, which is responsible for the “spikes” present on the surface of  
204 coronaviruses, indicate that these three genes, and therefore their corresponding protein products,  
205 tend to evolve faster compared to the other two genes. Findings of the present study could be directed  
206 to be useful for developing diagnostic reagents and probes for detecting a range of viruses and isolates  
207 in one test and for vaccine development, using the information about codon usage patterns in these  
208 genes.

## 209 4. Materials and Methods

### 210 4.1. Sequence data analyzed

211 The complete coding genomic sequences of 306 isolates of nCov reported across the world to date,  
212 were obtained from GISAID (available at <https://www.gisaid.org/epiflu-applications/next-hcov-19-app/>) and NCBI viruses database accessed as on 17 March 2020.

214 Then the sequences are selected according to their geographical distribution, the isolation date,  
215 and the host species. The complete coding genomic sequences of 30 coronaviruses were  
216 downloaded from the National Center for Biotechnological Information (NCBI) (available at <https://www.ncbi.nlm.nih.gov/>). For each virus we consider in following alphabetical order genes: E, M, N,  
218 RdRP and S.

### 219 4.2. Nucleotide Composition Analysis

220 The diverse nucleotide compositional properties are calculated for the coding sequences of 30 CoV  
221 genomes. These compositional properties comprise the frequencies of occurrence of each nucleotide  
222 (A, T, G, and C), AU and GC contents, nucleotides G + C at the first (GC1), second (GC2), and third  
223 codon positions (GC3). To calculate these values we use an in-house Python script. We calculate, also,  
224 mean frequencies of nucleotides G + C at the first and the second positions (GC12).

### 225 4.3. RSCU

226 *RSCU* vectors for all the genomes were computed by using an in-house Python script, following  
227 the formula:

$$RSCU_i = \frac{X_i}{\frac{1}{N_i} \sum_{j=1}^{n_i} X_j} \quad (1)$$

228 In the *RSCU*<sub>*i*</sub> *X*<sub>*i*</sub> is the number of occurrences, in a given genome, of codon *i*, and the sum in the  
229 denominator runs over its *n*<sub>*i*</sub> synonymous codons. If the *RSCU* value for a codon *i* is equal to 1, this  
230 codon was chosen equally and randomly. Codons with *RSCU* values greater than 1 have positive  
231 codon usage bias, while those with value less than 1 have relatively negative codon usage bias [? ].

232 *RSCU* heat maps were drawn with the CIMminer software [25], which uses Euclidean distances and  
233 the average linkage algorithm.

#### 234 4.4. Effective Number of Codons Analysis

*ENC* is an estimate of the frequency of different codons used in a coding sequence. In general, *ENC* ranges from 20 (when each amino acid is coded by just one and the same codon) to 61 (when all synonymous codons are used on an equal footing). Given a sequence of interest, the computation of *ENC* starts from  $F_\alpha$ , a quantity defined for each family  $\alpha$  of synonymous codons (one for each amino acid):

$$F_\alpha = \left( \frac{n_{k\alpha}}{n_\alpha} \right)^2 \quad (2)$$

where  $m_\alpha$  is the number of different codons in  $\alpha$  (each one appearing  $n_{1_\alpha}, n_{2_\alpha}, \dots, n_{m_\alpha}$  times in the sequence) and  $n_\alpha = \sum_{k=1}^{m_\alpha} n_{k\alpha}$ .

*ENC* then weights these quantities on a sequence:

$$ENC = N_s + \frac{K_2 \sum_{\alpha=1}^{K_2} n_\alpha}{\sum_{\alpha=1}^{K_2} (n_\alpha F_\alpha)} + \frac{K_3 \sum_{\alpha=1}^{K_3} n_\alpha}{\sum_{\alpha=1}^{K_3} (n_\alpha F_\alpha)} + \frac{K_4 \sum_{\alpha=1}^{K_4} n_\alpha}{\sum_{\alpha=1}^{K_4} (n_\alpha F_\alpha)} \quad (3)$$

235 where  $N_s$  is the number of families with one codon only and  $K_m$  is the number of families with  
236 degeneracy  $m$  (the set of 6 synonymous codons for *Leu* can be split into one family with degeneracy 2,  
237 similar to that of *Phe*, and one family with degeneracy 4, similar to that, e.g., of *Pro*).

238 We have evaluated *ENC* by using the implementation in *DAMBE* 5.0 [31].

#### 239 4.5. Codon Adaptation Index

Codon adaptation index *CAI* [?] is used to quantify the codon usage similarities between the virus and host coding sequences. The principle behind *CAI* is that codon usage in highly expressed genes can reveal the optimal (*i.e.*, most efficient for translation) codons for each amino acid. Hence, *CAI* is calculated based on a reference set of highly expressed genes to assess, for each codon  $i$ , the relative synonymous codon usages ( $RSCU_i$ ) and the relative codon adaptiveness ( $w_i$ ):

$$RSCU_i = \frac{X_i}{\frac{1}{n_i} \sum_{j=1}^{n_i} X_j}; \quad w_i = \frac{RSCU_i}{\max_{j=1, \dots, n_i} \{RSCU_j\}}; \quad (4)$$

In the  $RSCU_i$ ,  $X_i$  is the number of occurrences of codon  $i$  in the genome, and the sum in the denominator runs over the  $n_i$  synonyms of  $i$ ;  $RSCU$ s thus measure codon usage bias within a family of synonymous codons.  $w_i$  is then defined as the usage frequency of codon  $i$  compared to that of the optimal codon for the same amino acid encoded by  $i$ —*i.e.*, the one which is mostly used in a reference set of highly expressed genes. The *CAI* for a given gene  $g$  is calculated as the geometric mean of the usage frequencies of codons in that gene, normalized to the maximum *CAI* value possible for a gene with the same amino acid composition:

$$CAI_g = \left( \prod_{i=1}^{l_g} w_i \right)^{1/l_g}, \quad (5)$$

240 where the product runs over the  $l_g$  codons belonging to that gene (except the stop codon).

241 This index values range from 0 to 1, where the score 1 represents the tendency of a gene to always  
242 use the most frequently used synonymous codons in the host. The *CAI* analysis of these coding  
243 sequences are performed using *DAMBE* 5.0 [31]. The synonymous codon usage data of different  
244 hostes (human- *Homo sapiens* and other species) are retrieved from the codon usage database (available  
245 at: <http://www.kazusa.or.jp/codon/>).

To study the patterns of codon bias in the coronaviruses, we use Z-score values:

$$Z_v[(ENC)] = \frac{\langle ENC \rangle_{family} - \langle ENC \rangle_v}{\sigma_v / \sqrt{N_v}}, \quad (6)$$

246 where  $\langle ENC \rangle_{family}$  is the average of the ratio within a codon bias index in a family of a virus  $v$ ,  $\langle ENC \rangle_v$   
247 and  $\sigma_v$  are the average value of  $ENC$  and its standard deviation over the whole virus  $v$ , and  $N_v$  is the  
248 number of virus in the family (we use the standard deviation of the mean as we are comparing average  
249 values).

250 The same Z-score is evaluated for codon bias index CAI.

#### 251 4.6. ENC plot

ENC-plot analysis was performed to estimate the relative contributions of mutational bias and natural selection in shaping CUB of genes encoding for proteins that are crucial for 2019-nCoV: RdRP, the spike-surface glycoprotein (protein S), the small envelop protein (protein E), the matrix protein (M), and the nucleocapsid protein (N). The ENC-plot is a plot in which the ENC is the ordinate and the GC3 is the abscissa. Depending on the action of mutational bias and natural selection, different cases are discernable. If a gene is not subject to selection, a clear relationship is expected between ENC and GC3 [? ]:

$$ENC = 2 + s + \frac{29}{s^2 + (1 - s)^2} \quad (7)$$

252

253 where  $s$  represents the value of  $GC_3$  [? ]. Genes for which the codon choice is only constrained by  
254 mutational bias are expected to lie on or just below the Wright's theoretical curve. Alternatively, if  
255 a particular gene is subject to selection, it will fall below Wright's theoretical curve. In this case, the  
256 vertical distance between the point and the theoretical curve provides an estimation of the relative  
257 extent to which natural selection and mutational bias affect CUB.

258 To evaluate scatter of dots from theoretical Wright's curve, we calculate the module of distance and we  
259 drawn box plot calculated with an in-house Python script.

#### 260 4.7. Neutrality plot

261 We used a neutrality plot analysis [? ] to estimate the relative contribution of natural selection  
262 and mutational bias in shaping CUB of five crucial genes in the research field aiming to develop a  
263 vaccine against 2019-nCoV: M, N, S, RdRP, and E. In this analysis, the GC1 or GC2 values (ordinate)  
264 are plotted against the GC3 values (abscissa), and each gene is represented as a single point on this  
265 plane. In this case, the three stop codons (TAA, TAG, or TGA) and the three codons for isoleucine (ATT,  
266 ATC, and ATA) were excluded in calculation of GC3, and two single codons for methionine (ATG)  
267 and tryptophan (TGG) were excluded in all three (GC1, GC2, GC3) (Sueoka 1988). For each gene, we  
268 separately performed a Spearman correlation analysis between GC1 and GC2 with the GC3. If the  
269 correlation between GC1/2 and GC3 is statistically significant, the slope of the regression line provides  
270 a measure of the relative extent to which natural selection and mutational bias affect CUB of these  
271 genes (Sueoka 1999). In particular, if the mutational bias is the driving force that shapes CUB, then the  
272 corresponding data points should be distributed along the bisector (slope of unity). On the other hand,  
273 if natural selection also affects the codon choice of a family of genes, then the corresponding regression  
274 line should diverge from the bisector. Thus, the extent of the divergence between the regression line  
275 and the bisector indicates that the extent of codon choice due to the natural selection.

#### 276 4.8. Forsdyke plot

277 To study the evolutionary rates of genes M, N, S, RdRP, and E, we performed an analysis by  
278 using our previously defined Forsdyke plot [8]. Each gene in 2019-nCoV (taken as a reference) was  
279 confronted with the homologous gene in one of the 30 coronaviruses considered in this analysis. Each

280 pair of homologous genes is represented by a point in the Forsdyke plot, which correlates protein  
281 divergence with DNA divergence (see Methods in [8] for details). The protein sequences were aligned  
282 using Biopython. The DNA sequences were then aligned using the protein alignments as templates.  
283 Then, DNA divergences and protein divergences were assessed as explained in Methods in [8] by  
284 counting the number of mismatches in each pair of aligned sequences. Thus, each point in Forsdyke  
285 plots measures the divergence between pairs of homologous genes in the two species, as projected  
286 along with the phenotypic (protein) and nucleotidic (DNA) axis. The first step in each comparison is  
287 to compute the regression line between protein vs. DNA sequence divergence in the Forsdyke plot  
288 getting values of intercept and slope for each variant of gene. To test whether the regression parameters  
289 associated with each variant are different or not, we have followed a protocol founded by F-statistic  
290 test, considering a p-value  $\leq 0.05$ .

#### 291 4.9. Phylogenetic analysis

292 To explore the evolutionary relationships among the four genera of coronaviruses, phylogenetic  
293 analysis of the full-length genomic sequences of the 30 CoVs listed in Table 1 was performed. The  
294 sequences were aligned with the usage of ClustalO [21], [22]. The resulting multiple sequence  
295 alignment was used to build a phylogenetic tree by employing a maximum-likelihood (ML) method  
296 implemented in the software package MEGA version 10. 1 [15]. ModelTest-NG [6] was used to select  
297 the best-fit evolutionary model of nucleotide substitution, that is, GTR + G + I. Bootstrap analysis (100  
298 pseudo-replicates) was conducted in order to evaluate the statistical significance of the inferred trees.

299 **Author Contributions:** For research articles with several authors, a short paragraph specifying their individual  
300 contributions must be provided. The following statements should be used "Conceptualization, all.; methodology,  
301 M.D, S.F.and A.P.; software, M.D and S.F.; validation, all.; formal analysis, M.D , S.F A.P.; investigation, M.D,  
302 S.F, A.P; data curation, M.D, S.F, A.P ; writing–review and editing, all. All authors have read and agreed to the  
303 published version of the manuscript.', please turn to the [CRediT taxonomy](#) for the term explanation. Authorship  
304 must be limited to those who have contributed substantially to the work reported.

305 **Conflicts of Interest:** The authors declare no conflict of interest.

#### 306 Abbreviations

307 The following abbreviations are used in this manuscript:

308 MDPI Multidisciplinary Digital Publishing Institute  
DOAJ Directory of open access journals  
309 TLA Three letter acronym  
LD linear dichroism





310 **Appendix A**

311 *Appendix A.1*

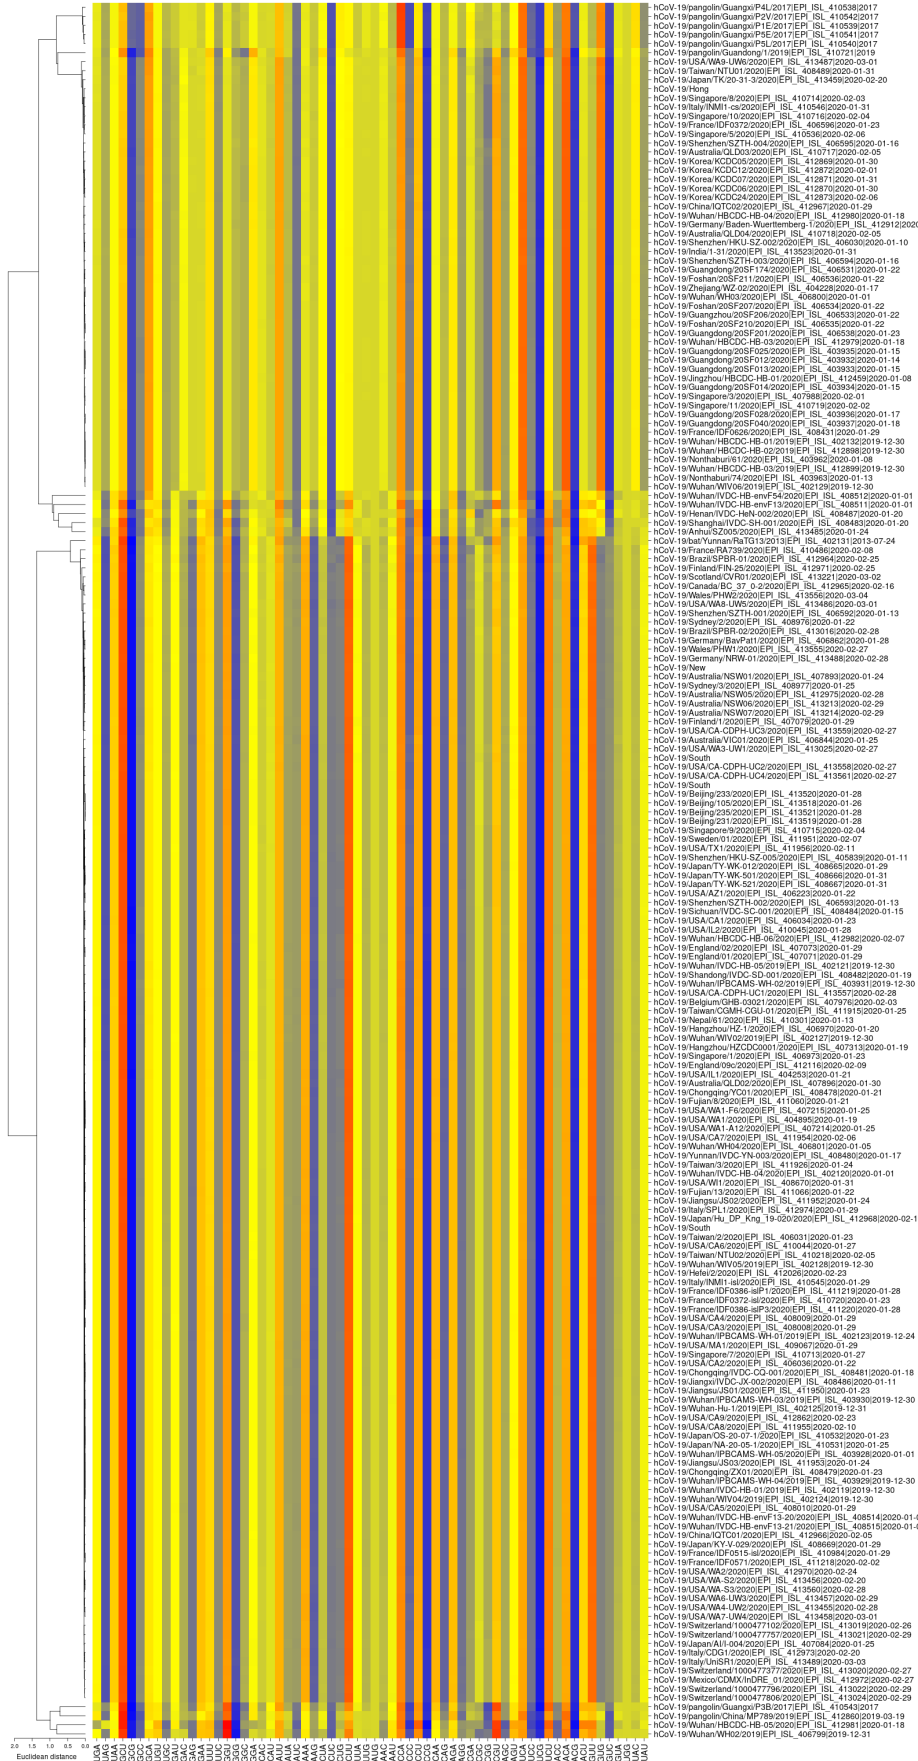

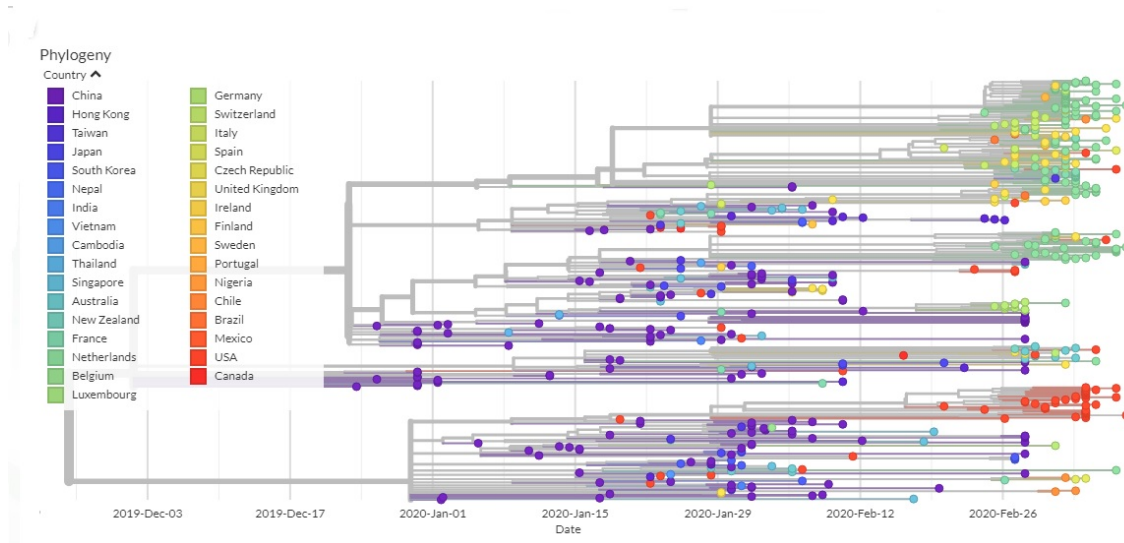

Figure A2. Phylogenetic tree from GIDAID.

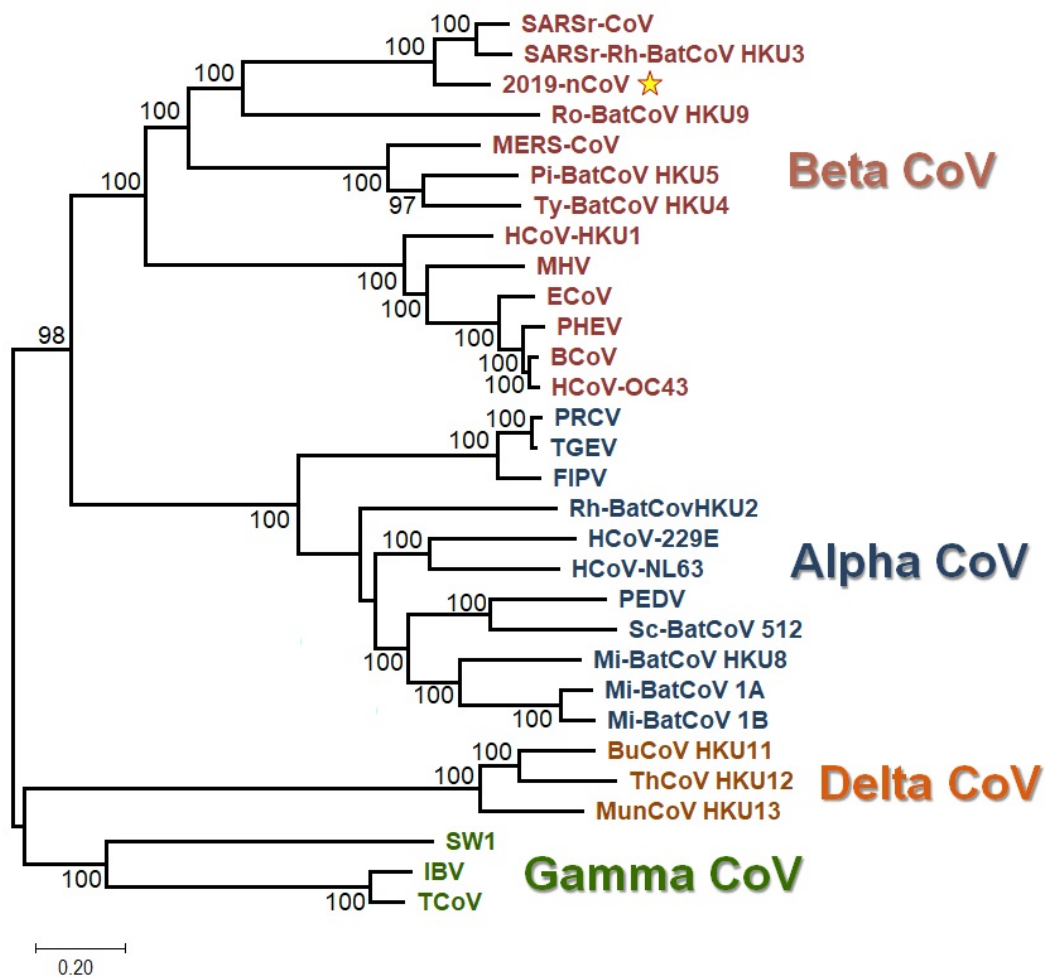

Figure A3. Unrooted ML-based tree of the 30 CoV genomic sequences. The four distinct color-coded clades correspond to the respective genera of CoVs. The 2019-nCoV sequence is indicated by a star. The branch lengths depict evolutionary distance. Bootstrap values higher than 50 are shown at the nodes. The scale bar at the lower left denotes the length of nucleotide substitutions per position.

## 312 References

- 313 1. Belalov IS, Lukashev AN, Causes and Implications of Codon Usage Bias in RNA Viruses PLoS One. 2013;  
314 8(2): e56642. Published online 2013, Feb 25. doi: 10.1371/journal.pone.0056642
- 315 2. Cavanagh D. The Coronavirus Surface Glycoprotein, the Coronaviridae Springer (1995), pp. 73-113
- 316 3. Ceraolo C., Giorgi FM. Genomic variance of the 2019-nCoV coronavirus, DOI: 10.1002/jmv.25700
- 317 4. Cao Y, Li L, Feng Z. et al. Comparative genetic analysis of the novel coronavirus (2019-nCoV/SARS-CoV-2)  
318 receptor ACE2 in different populations. Cell Discov 6, 11 (2020). <https://doi.org/10.1038/s41421-020-0147-1>
- 319 5. Chen Y, Xu Q, Yuan X, Li X. Analysis of the codon usage pattern in Middle East Respiratory Syndrome  
320 Coronavirus, Oncotarget, 2017, Vol. 8, (No. 66), pp: 110337-110349
- 321 6. Darriba D., Posada D, Kozlov AM, Stamatakis A., Morel B, Flouri T. ModelTest-NG: A New and Scalable  
322 Tool for the Selection of DNA and Protein Evolutionary Models., Mol Biol Evol. 2020 Jan 1;37(1):291-294. doi:  
323 10.1093/molbev/msz189
- 324 7. Dilucca M, Cimini G, Giansanti A. Essentiality, conservation, evolutionary pressure and codon bias in  
325 bacterial genomes, Gene. 2018 Jul 15;663:178-188. doi: 10.1016/j.gene.2018.04.017. Epub 2018 Apr 18
- 326 8. Forcelloni, S, Giansanti A. Mutations in disordered proteins as early indicators of nucleic acid changes  
327 triggering speciation. Sci Rep 10, 4467 (2020). <https://doi.org/10.1038/s41598-020-61466-5>
- 328 9. Forni D, Cagliani R, Clerici M, Sironi M. Molecular Evolution of Human Coronavirus Genomes. Trends  
329 Microbiol. 2017; 25:35-48
- 330 10. Gorbalenya AE, Luis Enjuanes, John Ziebuhr, Eric J. Snijder. Nidovirales: Evolving the largest RNA virus  
331 genome, Volume 117, Issue 1, April 2006, Pages 17-37 <https://doi.org/10.1016/j.virusres.2006.01.017>
- 332 11. Grantham R, Gautier C, Gouy M, Mercier R and Pavé A. Codon catalog usage and the genome hypothesis,  
333 Nucleic Acids Research, vol. 8, no. 1, pp. r49-r62, 1980
- 334 12. Gu W., Zhou T. Analysis of synonymous codon usage in SARS Coronavirus and other viruses in the  
335 Nidovirales, Virus Res. 2004 May;101(2):155-61
- 336 13. Jenkins GM and Holmes EC. The extent of codon usage bias in human RNA viruses and its evolutionary  
337 origin, Virus Research, vol. 92, no. 1, pp. 1-7, 2003
- 338 14. Ji W, Wang W, Zhao X, Zai J, Li X. Cross-species transmission of the newly identified coronavirus 2019-nCoV.  
339 J Med Virol. 2020;92: 433-440. <https://doi.org/10.1002/jmv.25682>
- 340 15. Kumar S Stecher G, Li M, Knyaz C, Tamura K. MEGA X: Molecular Evolutionary Genetics Analysis across  
341 Computing Platforms. Mol Biol Evol. 2018 Jun 1;35(6):1547-1549. doi: 10.1093/molbev/msy096
- 342 16. Lia G, Wang H, Wanga S, Xinga G, Zhanga C, Zhanga W. Insights into the genetic and host  
343 adaptability of emerging porcine circovirus, VIRULENCE 2018, VOL. 9, NO. 1, 1301-1313  
344 <https://doi.org/10.1080/21505594.2018.1492863>
- 345 17. Neuman BW, Kiss G, Kunding AH, Bhella D, Baksh MF, Connelly S. A structural analysis of M protein in  
346 coronavirus assembly and morphology J. Struct. Biol., 174 (2011), pp. 11-22
- 347 18. Ruch T, Machamer C. The coronavirus E protein: assembly and beyond Viruses, 4 (2012), pp. 363-382
- 348 19. Sheihk. Analysis of preferred codon usage in the coronavirus N genes and their implications for genome  
349 evolution and vaccine design, Journal of Virological Methods 277 (2020) 113806
- 350 20. Siddell SG, Ziebuhr J, Snijder EJ. Coronaviruses, Toroviruses, and Arteriviruses. Topley and Wilson's  
351 Microbiology and Microbial Infections (2005)
- 352 21. Sievers F, Higgins DG. Clustal omega. Curr Protoc Bioinformatics. 2014 Dec 12;48:3.13.1-16. doi:  
353 10.1002/0471250953.bi0313s48
- 354 22. Sievers F, Higgins DG. Methods Mol Biol. 2014;1079:105-16. doi: 10.1007/978-1-62703-646-7\_6 Clustal  
355 Omega, accurate alignment of very large numbers of sequences
- 356 23. Sueoka N. Directional mutation pressure and neutral molecular evolution. Proc Natl Acad Sci U S A. 1988;  
357 85:2653-2657
- 358 24. Timani KA, Ye L, Ye L, Zhu Y, Wu Z, Gong Z. Cloning, sequencing, expression, and purification  
359 of SARS-associated coronavirus nucleocapsid protein for serodiagnosis of SARS, J Clin Virol. 2004  
360 Aug;30(4):309-12.
- 361 25. Weinstein JN, Myers TG, O'Connor PM, Friend SH, Fornace AJ Jr, Kohn KW, Fojo T, Bates SE, Rubinstein  
362 LV, Anderson NL, Buolamwini JK, van Osdol WW, Monks AP, Scudiero DA, Sausville EA, Zaharevitz DW,

- 363 Bunow B, Viswanadhan VN, Johnson GS, Wittes RE, Paull KD (1997) An information-intensive approach to  
364 the molecular pharmacology of cancer. *Science* 275(5298):343–9
- 365 26. Woo PC, Huang Y, Lau SK, Yuen KY. Coronavirus genomics and bioinformatics analysis. *Viruses* 2010  
366 Aug;2(8):1804-20. doi: 10.3390/v2081803. Epub 2010 Aug 24. PMID: 21994708; PMCID: PMC3185738
- 367 27. Woo PC, Wong BH, Huang Y, Lau SK, Yuen KY. Cytosine deamination and selection of CpG suppressed  
368 clones are the two major independent biological forces that shape codon usage bias in coronaviruses, *Virology*  
369 2007, 369, 431-442
- 370 28. Woo PC, Lau Y, Huang Y, Yuen KY. Coronavirus Diversity, Phylogeny and Interspecies Jumping.  
371 *Experimental Biology and Medicine*, 234(10), 1117–1127.(2009). <https://doi.org/10.3181/0903-MR-94>
- 372 29. Wright F. The ‘effective number of codons’ used in a gene, *Gene*. 1990 Mar 1;87(1):23-9
- 373 30. Wu A, Peng Y et al. Genome Composition and Divergence of the Novel Coronavirus (2019-nCoV) Originating  
374 in China *Cell Host Microbe*, *Cell Host Microbe*. 2020 Mar 11;27(3):325-328. doi: 10.1016/j.chom.2020.02.001.  
375 Epub 2020 Feb 7
- 376 31. Xia X, DAMBE5: a comprehensive software package for data analysis in molecular biology and evolution. ,  
377 *Mol Biol Evol*. 2013 Jul;30(7):1720-8. doi: 10.1093/molbev/mst064. Epub 2013 Apr 5

378 © 2020 by the authors. Submitted to *Journal Not Specified* for possible open access  
379 publication under the terms and conditions of the Creative Commons Attribution (CC BY) license  
380 (<http://creativecommons.org/licenses/by/4.0/>).
